# Supplementary material for: Levels of ankle–brachial index and the risk of diabetes mellitus complications
Source: PubMed Central journal article supplement — BMJ Open Diabetes Res Care. 2020 Mar 5;8(1):e000977. doi: 10.1136/bmjdrc-2019-000977 (PMC7059529; doi:10.1136/bmjdrc-2019-000977), 2020-03-05
Supplement: bmjdrc-2019-000977supp001.pdf [file bmjdrc-2019-000977supp001.pdf]

## Supplementary Material

### Levels of Ankle-Brachial Index and the Risk of Diabetes Mellitus Complications

Lia Alves-Cabratosa<sup>a</sup>, MD, PhD; Marc Comas-Cufí<sup>a</sup>, PhD; Anna Ponjoan<sup>a,c</sup>, PhD; Maria Garcia-Gil<sup>a</sup>, MD, PhD; Ruth Martí-Lluch<sup>a,c</sup>, PhD; Jordi Blanch<sup>a</sup>, PhD; Marc Elosua-Bayes<sup>a</sup>, MSc; Dídac Parramon<sup>a,d</sup>, MD, PhD; Lourdes Camós<sup>a,d</sup>, PhD; Lidia Guzmán<sup>a</sup>, MSc; Rafel Ramos<sup>a,b,c,d</sup>, MD, PhD.

- a. Vascular Health Research Group of Girona (ISV-Girona). Institut Universitari d'Investigació en Atenció Primària Jordi Gol (IDIAP Jordi Gol), Catalonia, Spain.
- b. Translab Research Group. Department of Medical Sciences, School of Medicine, University of Girona, Catalonia, Spain.
- c. Institut d'Investigació Biomèdica de Girona (IDIBGI), Dr. Josep Trueta University Hospital, Catalonia, Spain.
- d. Primary Care Services, Girona. Catalan Institute of Health (ICS), Catalonia Spain.

Corresponding author:

Dr. Rafel Ramos

Vascular Health Research Group of Girona (ISV-Girona). Institut Universitari d'Investigació en Atenció Primària Jordi Gol (IDIAP Jordi Gol)

Phone: +34 972 487968; FAX: +34 972 214100;

E-mail: [rramos.girona.ics@gencat.cat](mailto:rramos.girona.ics@gencat.cat)

## TABLE OF CONTENTS

|                                                                                                                                                                                                                              |    |
|------------------------------------------------------------------------------------------------------------------------------------------------------------------------------------------------------------------------------|----|
| Supplemental Methods .....                                                                                                                                                                                                   | 3  |
| Imputation Models .....                                                                                                                                                                                                      | 3  |
| Supplemental Tables.....                                                                                                                                                                                                     | 3  |
| Supplemental Table S1. Missing Counts and Comparison of Baseline Characteristics<br>Between Imputed Data and Complete Cases.....                                                                                             | 3  |
| Supplemental Table S2. Variables of adjustment used in the Cox proportional hazard<br>models .....                                                                                                                           | 5  |
| Supplemental Table S3. Baseline Characteristics of the Study Population. Complete<br>Cases .....                                                                                                                             | 6  |
| Supplemental Table S4. Events and Incidence Rate* (95% Confidence Interval) for the<br>Outcomes by Ankle Brachial Index Categories. Complete Cases .....                                                                     | 9  |
| Supplemental Figures .....                                                                                                                                                                                                   | 10 |
| Supplemental Figure S1. Kaplan-Meier curves for the study outcomes.....                                                                                                                                                      | 10 |
| Supplemental Figure S2. Hazard Ratios for Each Outcome by Ankle Brachial Index<br>Categories. Complete Cases. ABI indicates ankle brachial index; AMI, acute myocardial<br>infarction; MCE, major cardiovascular event. .... | 11 |

## Supplemental Methods

### Imputation Models

The imputation models included the following variables: age, sex, ABI, smoking status, weight, height, natural logarithm (ln) of systolic BP, ln(pulse pressure), ln(total serum cholesterol), ln(LDL cholesterol), ln(HDL cholesterol), ln(triglycerides), HbA1c, ln(glucose), diabetes duration, comorbidities (hypertension, atrial fibrillation, heart failure, COPD, nephropathy, retinopathy, neuropathy, malignant neoplasms, dyslipidaemia, arthritis, asthma, hypothyroidism, acute myocardial infarction, angina, transient ischemic attack, stroke), and medications (antidiabetic therapy, diuretics, beta blocking agents, calcium channel blockers, agents acting on the renin-angiotensin system, other antihypertensives, statins, other lipid modifying agents, aspirin, systemic corticosteroids, psycholeptics, and psychoanaleptics). The censoring indicator and the Nelson-Aalen estimate of the cumulative hazard function for the time to cardiovascular disease were also included.[1] Some variables were ln transformed to avoid the unlikely possibility of imputing any negative numbers, and converted back to their original scale after imputation.

### Supplemental Tables

Supplemental Table S1. Missing Counts and Comparison of Baseline Characteristics Between Imputed Data and Complete Cases

| Variable                  | Missing Counts | Imputed Dataset (n = 34689) | Complete Cases (n = 18196) |
|---------------------------|----------------|-----------------------------|----------------------------|
| Age, years                | -              | 66.23 (10.47)               | 66.53 (10.18)              |
| Men                       | -              | 17880 (51.5%)               | 9232 (50.7%)               |
| Smoking habit             | -              | 8003 (23.1%)                | 4191 (23.0%)               |
| BMI, kg/m <sup>2</sup>    | 26.7%          | 30.38 (5.00)                | 30.32 (4.81)               |
| Systolic BP, mmHg         | 9.0%           | 136.17 (15.78)              | 135.87 (15.41)             |
| Diastolic BP, mmHg        | 9.0%           | 77.15 (9.51)                | 76.90 (9.34)               |
| Pulse Pressure, mmHg      | 9.0%           | 59.02 (14.44)               | 58.97 (14.15)              |
| Total Cholesterol, mmol/l | 20.9%          | 5.06 (0.99)                 | 5.04 (0.93)                |
| LDL Cholesterol, mmol/l   | 27.3%          | 2.96 (0.85)                 | 2.94 (0.79)                |
| HDL Cholesterol, mmol/l   | 26.6%          | 1.36 (0.42)                 | 1.33 (0.34)                |
| Triglycerides, mmol/l     | 24.5%          | 1.73 (1.09)                 | 1.69 (0.97)                |
| HbA1c, mmol/mol           | 24.9%          | 54.91 (17.09)               | 54.71 (16.48)              |
| HbA1c, %                  | 24.9%          | 7.17 (1.56)                 | 7.16 (1.51)                |
| Glucose, mmol/l           | 19.5%          | 8.33 (2.76)                 | 8.27 (2.69)                |
| Diabetes duration         | -              | 5.76 (5.66)                 | 5.80 (5.54)                |
| Comorbidities             |                |                             |                            |
| Hypertension              | -              | 23554 (67.9%)               | 12706 (69.8%)              |
| Atrial fibrillation       | -              | 1673 (4.8%)                 | 846 (4.6%)                 |

| Variable                                      | Missing Counts | Imputed Dataset (n = 34689) | Complete Cases (n = 18196) |
|-----------------------------------------------|----------------|-----------------------------|----------------------------|
| Heart failure                                 | -              | 841 (2.4%)                  | 423 (2.3%)                 |
| COPD                                          | -              | 3161 (9.1%)                 | 1614 (8.9%)                |
| Malignant neoplasms                           | -              | 2743 (7.9%)                 | 1382 (7.6%)                |
| Dyslipidaemia                                 | -              | 17914 (51.6%)               | 10031 (55.1%)              |
| Arthritis                                     | -              | 284 (0.8%)                  | 123 (0.7%)                 |
| Asthma                                        | -              | 1433 (4.1%)                 | 760 (4.2%)                 |
| Hypothyroidism                                | -              | 2064 (6.0%)                 | 1102 (6.1%)                |
| Complications of diabetes                     |                |                             |                            |
| Nephropathy                                   | -              | 1918 (5.5%)                 | 1011 (5.6%)                |
| Retinopathy                                   | -              | 682 (2.0%)                  | 355 (2.0%)                 |
| Neuropathy                                    | -              | 291 (0.8%)                  | 136 (0.7%)                 |
| Medication                                    |                |                             |                            |
| Antidiabetic therapy                          | -              | 27259 (78.6%)               | 14731 (81.0%)              |
| Diuretics                                     | -              | 8244 (23.8%)                | 4416 (24.3%)               |
| Beta-blockers                                 | -              | 4325 (12.5%)                | 2312 (12.7%)               |
| Calcium channel blockers                      | -              | 5891 (17.0%)                | 3248 (17.9%)               |
| Agents acting on the renin-angiotensin system | -              | 20046 (57.8%)               | 11008 (60.5%)              |
| Other antihypertensives                       | -              | 1648 (4.8%)                 | 850 (4.7%)                 |
| Statins                                       | -              | 15518 (44.7%)               | 8894 (48.9%)               |
| Other lipid-lowering agent                    | -              | 2364 (6.8%)                 | 1237 (6.8%)                |
| Aspirin                                       | -              | 9716 (28.0%)                | 5397 (29.7%)               |
| Systemic corticosteroids                      | -              |                             |                            |
| Psycholeptics                                 | -              |                             |                            |
| Psychoanaleptics                              | -              |                             |                            |

Values are presented as mean (SD) or N(%).

ABI indicates ankle brachial index; BMI, body mass index; BP, blood pressure; COPD, chronic obstructive pulmonary disease; HbA1c, glycated hemoglobin A; HDL, high-density lipoprotein; LDL, low-density lipoprotein; n, number of participants.

Supplemental Table S2. Variables of adjustment used in the Cox proportional hazard models

| <b>Outcome</b>  | <b>Adjusting variables</b>                                                                                                                                                                                                                                                                                                       |
|-----------------|----------------------------------------------------------------------------------------------------------------------------------------------------------------------------------------------------------------------------------------------------------------------------------------------------------------------------------|
| AMI             | Age, BMI, HDL Cholesterol, LDL Cholesterol, Total Cholesterol, HbA1c, Sex, Aspirin, Calcium channel blockers, Antidiabetic therapy, Smoking habit, Pulse Pressure, Systolic BP, Triglycerides                                                                                                                                    |
| Ischemic stroke | Age, LDL Cholesterol, Total Cholesterol, HbA1c, Sex, Atrial fibrillation, Antidiabetic therapy, Smoking habit, Systolic BP                                                                                                                                                                                                       |
| MCE *           | Age, BMI, LDL Cholesterol, Total Cholesterol, Glucose, HbA1c, Sex, Atrial fibrillation, Aspirin, Calcium channel blockers, Chronic kidney disease, Antidiabetic therapy, Smoking habit, Systolic BP, Triglycerides                                                                                                               |
| Mortality †     | Age, BMI, HDL Cholesterol, Total Cholesterol, Diastolic BP, HbA1c, Sex, Atrial fibrillation, Diuretics, Beta-blockers, Chronic kidney disease, COPD, Malignant neoplasms, Smoking habit, Statins                                                                                                                                 |
| Nephropathy     | Age, BMI, LDL Cholesterol, Glucose, HbA1c, Sex, Atrial fibrillation, Other antihypertensives, Diuretics, Beta-blockers, Calcium channel blockers, Agents acting on the renin-angiotensin system, Other lipid-lowering agent, Antidiabetic therapy, Hypertension, Smoking habit, Pulse Pressure, Triglycerides, Diabetes duration |
| Retinopathy     | LDL Cholesterol, Total Cholesterol, HbA1c, Aspirin, Chronic kidney disease, Antidiabetic therapy, Pulse Pressure, Diabetes duration                                                                                                                                                                                              |
| Neuropathy      | LDL Cholesterol, HbA1c, Aspirin, Chronic kidney disease, COPD, Antidiabetic therapy, Smoking habit, Pulse Pressure, Diabetes duration                                                                                                                                                                                            |

\* A composite of AMI and ischemic stroke.

† All-cause mortality.

AMI indicates acute myocardial infarction; BMI, body mass index; BP, blood pressure; COPD, chronic obstructive pulmonary disease; HbA1c, glycated hemoglobin A; HDL, high-density lipoprotein; LDL, low-density lipoprotein.

Supplemental Table S3. Baseline Characteristics of the Study Population. Complete Cases

| Variable                  | 0.4 ≤ ABI < 0.5<br>n = 56 | 0.5 ≤ ABI < 0.7<br>n = 450 | 0.7 ≤ ABI < 0.9<br>n = 2091 | 0.9 ≤ ABI < 1.1<br>n = 10486 | 1.1 ≤ ABI < 1.3<br>n = 4098 | 1.3 ≤ ABI < 3<br>n = 1015 |
|---------------------------|---------------------------|----------------------------|-----------------------------|------------------------------|-----------------------------|---------------------------|
| Age, years                | 70.44 (9.63)              | 70.33 (9.55)               | 67.71 (10.00)               | 66.39 (10.22)                | 65.32 (10.05)               | 68.42 (9.92)              |
| Men                       | 35 (62.5%)                | 282 (62.7%)                | 1127 (53.9%)                | 5060 (48.3%)                 | 2172 (53.0%)                | 556 (54.8%)               |
| Smoking habit             | 21 (37.5%)                | 155 (34.4%)                | 576 (27.5%)                 | 2385 (22.7%)                 | 857 (20.9%)                 | 197 (19.4%)               |
| BMI, kg/m <sup>2</sup>    | 29.58 (5.41)              | 29.51 (4.83)               | 30.51 (4.91)                | 30.29 (4.79)                 | 30.34 (4.73)                | 30.51 (5.08)              |
| Systolic BP, mmHg         | 140.43 (17.22)            | 139.88 (17.20)             | 137.90 (16.77)              | 135.40 (14.99)               | 135.63 (15.13)              | 135.47<br>(16.32)         |
| Diastolic BP, mmHg        | 74.21 (9.51)              | 74.72 (9.79)               | 76.39 (9.62)                | 76.87 (9.26)                 | 77.63 (9.21)                | 76.38 (9.61)              |
| Pulse Pressure, mmHg      | 66.21 (13.44)             | 65.16 (16.48)              | 61.51 (15.44)               | 58.53 (13.72)                | 58.00 (13.85)               | 59.09 (14.60)             |
| Total Cholesterol, mmol/l | 5.15 (0.85)               | 5.07 (0.96)                | 5.08 (0.96)                 | 5.05 (0.94)                  | 5.03 (0.91)                 | 4.95 (0.86)               |
| LDL Cholesterol, mmol/l   | 3.05 (0.84)               | 2.98 (0.85)                | 2.99 (0.80)                 | 2.94 (0.79)                  | 2.93 (0.79)                 | 2.86 (0.76)               |
| HDL Cholesterol, mmol/l   | 1.24 (0.37)               | 1.30 (0.34)                | 1.31 (0.33)                 | 1.34 (0.34)                  | 1.34 (0.35)                 | 1.36 (0.36)               |
| Triglycerides, mmol/l     | 1.91 (1.02)               | 1.74 (0.91)                | 1.73 (0.99)                 | 1.70 (0.98)                  | 1.67 (0.96)                 | 1.62 (0.92)               |
| HbA1c, mmol/mol           | 55.76 (15.15)             | 57.95 (18.12)              | 56.03 (17.22)               | 54.45 (16.42)                | 54.27 (16.31)               | 54.88 (15.25)             |
| HbA1c, %                  | 7.25 (1.39)               | 7.45 (1.66)                | 7.28 (1.58)                 | 7.13 (1.50)                  | 7.12 (1.49)                 | 7.17 (1.40)               |
| Glucose, mmol/l           | 8.03 (2.48)               | 8.42 (2.74)                | 8.46 (2.94)                 | 8.24 (2.66)                  | 8.26 (2.62)                 | 8.18 (2.58)               |
| Diabetes duration         | 6.37 (5.00)               | 6.72 (5.52)                | 6.32 (5.98)                 | 5.73 (5.51)                  | 5.50 (5.28)                 | 6.31 (5.83)               |
| Comorbidities             |                           |                            |                             |                              |                             |                           |

| Variable                                      | 0.4 ≤ ABI < 0.5<br>n = 56 | 0.5 ≤ ABI < 0.7<br>n = 450 | 0.7 ≤ ABI < 0.9<br>n = 2091 | 0.9 ≤ ABI < 1.1<br>n = 10486 | 1.1 ≤ ABI < 1.3<br>n = 4098 | 1.3 ≤ ABI < 3<br>n = 1015 |
|-----------------------------------------------|---------------------------|----------------------------|-----------------------------|------------------------------|-----------------------------|---------------------------|
| Hypertension                                  | 40 (71.4%)                | 340 (75.6%)                | 1559 (74.6%)                | 7282 (69.4%)                 | 2739 (66.8%)                | 746 (73.5%)               |
| Atrial fibrillation                           | 2 (3.6%)                  | 29 (6.4%)                  | 125 (6.0%)                  | 461 (4.4%)                   | 159 (3.9%)                  | 70 (6.9%)                 |
| Heart failure                                 | 4 (7.1%)                  | 10 (2.2%)                  | 72 (3.4%)                   | 218 (2.1%)                   | 83 (2.0%)                   | 36 (3.5%)                 |
| COPD                                          | 10 (17.9%)                | 68 (15.1%)                 | 246 (11.8%)                 | 913 (8.7%)                   | 283 (6.9%)                  | 94 (9.3%)                 |
| Malignant neoplasms                           | 7 (12.5%)                 | 39 (8.7%)                  | 155 (7.4%)                  | 809 (7.7%)                   | 302 (7.4%)                  | 70 (6.9%)                 |
| Complications of diabetes                     |                           |                            |                             |                              |                             |                           |
| Nephropathy                                   | 7 (12.5%)                 | 42 (9.3%)                  | 132 (6.3%)                  | 587 (5.6%)                   | 178 (4.3%)                  | 65 (6.4%)                 |
| Retinopathy                                   | 4 (7.1%)                  | 17 (3.8%)                  | 46 (2.2%)                   | 197 (1.9%)                   | 68 (1.7%)                   | 23 (2.3%)                 |
| Neuropathy                                    | 2 (3.6%)                  | 11 (2.4%)                  | 20 (1.0%)                   | 62 (0.6%)                    | 28 (0.7%)                   | 13 (1.3%)                 |
| Medication                                    |                           |                            |                             |                              |                             |                           |
| Antidiabetic therapy                          | 44 (78.6%)                | 387 (86.0%)                | 1734 (82.9%)                | 8428 (80.4%)                 | 3291 (80.3%)                | 847 (83.4%)               |
| Diuretics                                     | 21 (37.5%)                | 137 (30.4%)                | 555 (26.5%)                 | 2571 (24.5%)                 | 881 (21.5%)                 | 251 (24.7%)               |
| Beta-blockers                                 | 6 (10.7%)                 | 64 (14.2%)                 | 298 (14.3%)                 | 1338 (12.8%)                 | 471 (11.5%)                 | 135 (13.3%)               |
| Calcium channel blockers                      | 16 (28.6%)                | 109 (24.2%)                | 408 (19.5%)                 | 1843 (17.6%)                 | 676 (16.5%)                 | 196 (19.3%)               |
| Agents acting on the renin-angiotensin system | 38 (67.9%)                | 317 (70.4%)                | 1381 (66.0%)                | 6292 (60.0%)                 | 2341 (57.1%)                | 639 (63.0%)               |
| Other antihypertensives                       | 4 (7.1%)                  | 35 (7.8%)                  | 117 (5.6%)                  | 454 (4.3%)                   | 186 (4.5%)                  | 54 (5.3%)                 |

| Variable                   | 0.4 ≤ ABI < 0.5<br>n = 56 | 0.5 ≤ ABI < 0.7<br>n = 450 | 0.7 ≤ ABI < 0.9<br>n = 2091 | 0.9 ≤ ABI < 1.1<br>n = 10486 | 1.1 ≤ ABI < 1.3<br>n = 4098 | 1.3 ≤ ABI < 3<br>n = 1015 |
|----------------------------|---------------------------|----------------------------|-----------------------------|------------------------------|-----------------------------|---------------------------|
| Statins                    | 28 (50.0%)                | 259 (57.6%)                | 1051 (50.3%)                | 5177 (49.4%)                 | 1925 (47.0%)                | 454 (44.7%)               |
| Other lipid-lowering agent | 6 (10.7%)                 | 38 (8.4%)                  | 129 (6.2%)                  | 760 (7.2%)                   | 247 (6.0%)                  | 57 (5.6%)                 |
| Aspirin                    | 17 (30.4%)                | 180 (40.0%)                | 705 (33.7%)                 | 3020 (28.8%)                 | 1140 (27.8%)                | 335 (33.0%)               |

Values are presented as mean (SD) or n(%).

ABI indicates ankle brachial index; BMI, body mass index; BP, blood pressure; COPD, chronic obstructive pulmonary disease; HbA1c, glycated hemoglobin A; HDL, high-density lipoprotein; LDL, low-density lipoprotein; n, number of participants.



Supplemental Table S4. Events and Incidence Rate\* (95% Confidence Interval) for the Outcomes by Ankle Brachial Index Categories. Complete Cases

|                 |    | 0.4 ≤ ABI < 0.5    |     | 0.5 ≤ ABI < 0.7   |     | 0.7 ≤ ABI < 0.9   |      | 0.9 ≤ ABI < 1.1   |     | 1.1 ≤ ABI < 1.3   |     | 1.3 ≤ ABI         |  |
|-----------------|----|--------------------|-----|-------------------|-----|-------------------|------|-------------------|-----|-------------------|-----|-------------------|--|
| Cardiovascular  |    |                    |     |                   |     |                   |      |                   |     |                   |     |                   |  |
| AMI             | 1  | 3.6 (0.5, 25.6)    | 23  | 9.7 (6.4, 14.5)   | 68  | 5.7 (4.5, 7.2)    | 265  | 4.3 (3.8, 4.8)    | 93  | 3.7 (3.0, 4.6)    | 30  | 5.0 (3.5, 7.1)    |  |
| Ischemic stroke | 4  | 15.0 (5.6, 39.9)   | 52  | 22.6 (17.2, 29.6) | 129 | 10.9 (9.2, 13.0)  | 535  | 8.8 (8.0, 9.5)    | 172 | 7.0 (6.0, 8.1)    | 71  | 12.0 (9.5, 15.1)  |  |
| MCE †           | 5  | 18.9 (7.9, 45.5)   | 71  | 31.5 (24.9, 39.7) | 195 | 16.7 (14.5, 19.2) | 774  | 12.8 (11.9, 13.7) | 259 | 10.6 (9.4, 11.9)  | 96  | 16.4 (13.4, 20.0) |  |
| Mortality ‡     | 17 | 60.5 (37.6, 97.3)  | 112 | 46.1 (38.3, 55.4) | 280 | 23.0 (20.5, 25.9) | 1060 | 17.0 (16.0, 18.0) | 349 | 13.9 (12.5, 15.4) | 157 | 25.7 (21.9, 30.0) |  |
| Nephropathy     | 13 | 60.2 (34.9, 103.6) | 102 | 52.0 (42.8, 63.1) | 354 | 33.5 (30.2, 37.2) | 1439 | 26.0 (24.6, 27.3) | 552 | 24.3 (22.4, 26.4) | 167 | 31.2 (26.8, 36.3) |  |
| Retinopathy     | 4  | 16.3 (6.1, 43.4)   | 41  | 18.4 (13.6, 25.0) | 105 | 9.0 (7.5, 11.0)   | 346  | 5.7 (5.2, 6.4)    | 123 | 5.0 (4.2, 6.0)    | 52  | 8.9 (6.8, 11.7)   |  |
| Neuropathy      | 1  | 3.7 (0.5, 26.5)    | 28  | 12.1 (8.4, 17.6)  | 80  | 6.8 (5.4, 8.4)    | 225  | 3.7 (3.2, 4.2)    | 89  | 3.6 (2.9, 4.4)    | 24  | 4.0 (2.7, 6.0)    |  |

\* per 1000 person-years.

† A composite of AMI and ischemic stroke.

‡ All-cause mortality.

ABI indicates ankle brachial index; AMI, acute myocardial infarction; MCE, major cardiovascular event; n, number of participants.

## Supplemental Figures

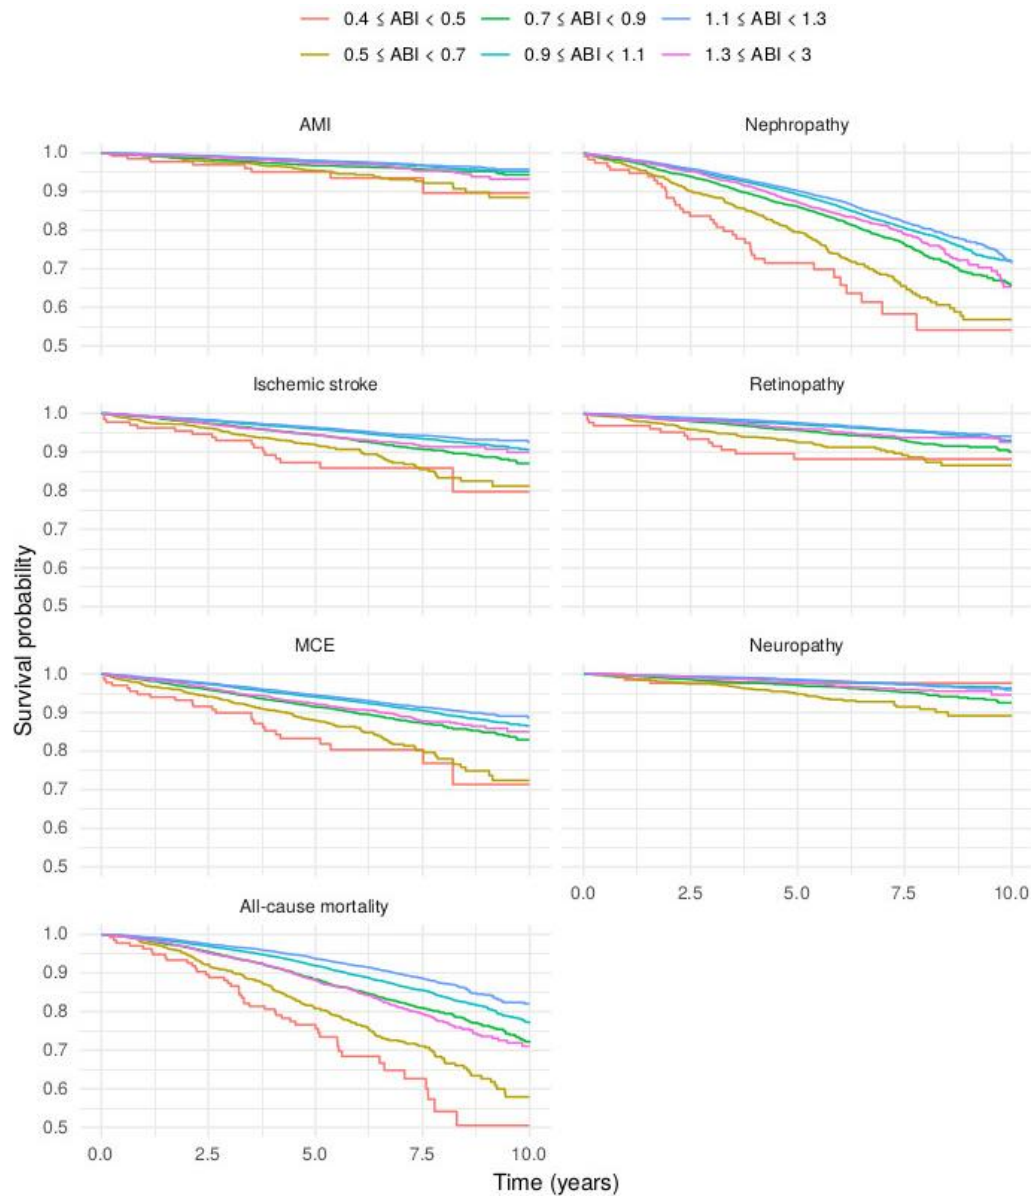

Supplemental Figure S1. Kaplan-Meier curves for the study outcomes

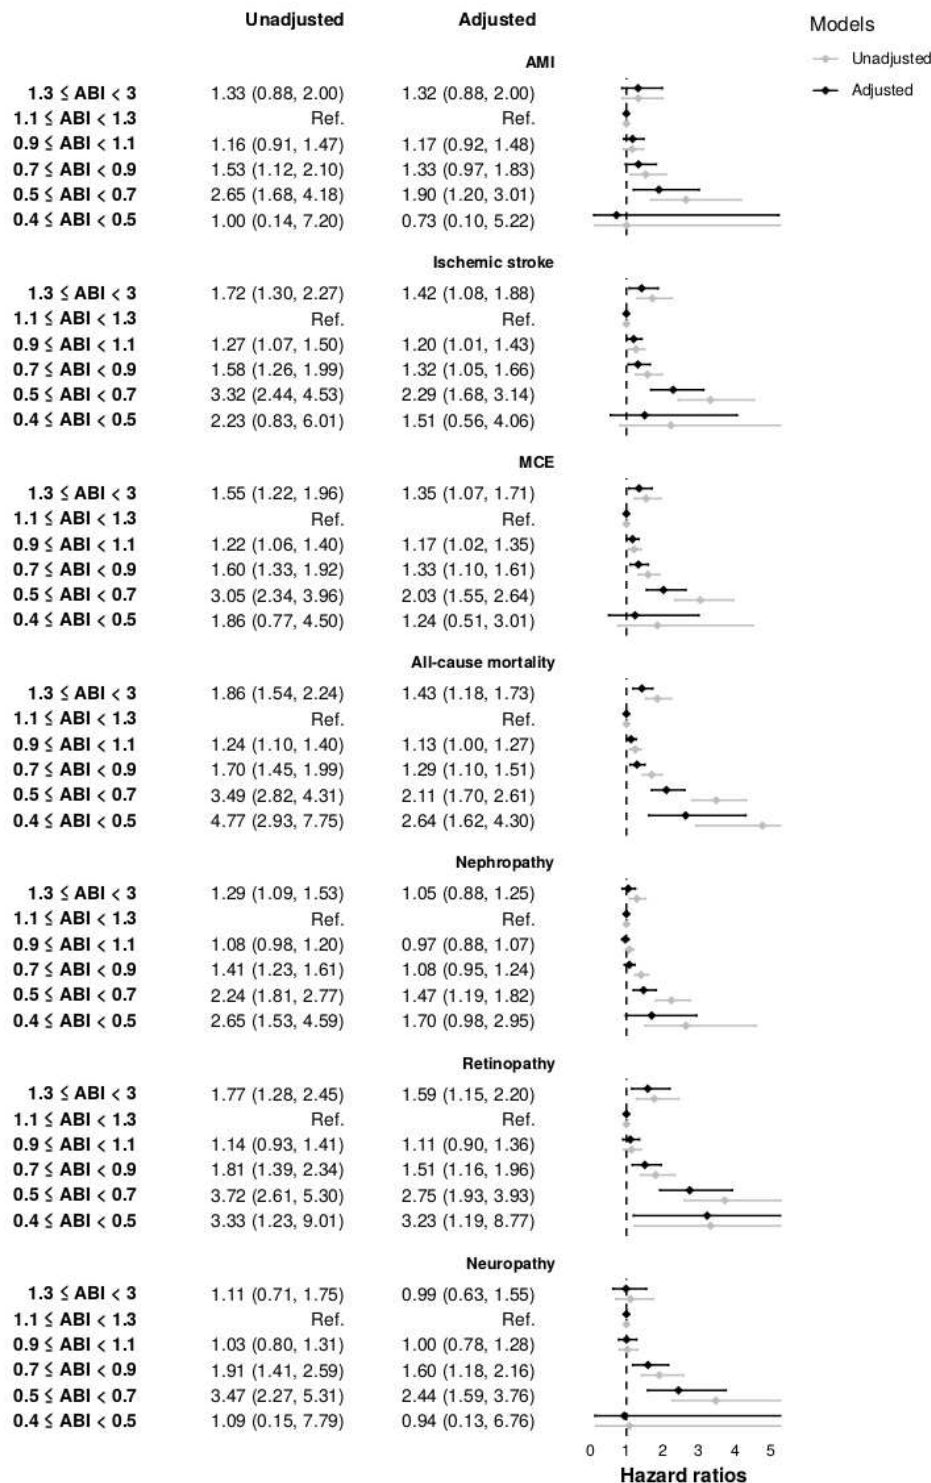

Supplemental Figure S2. Hazard Ratios for Each Outcome by Ankle Brachial Index Categories. Complete Cases. ABI indicates ankle brachial index; AMI, acute myocardial infarction; MCE, major cardiovascular event.

## REFERENCES

1. White IR, Royston P, Wood AM (2011) Multiple imputation using chained equations: Issues and guidance for practice. *Stat Med* 30(4):377–399. <https://doi.org/10.1002/sim.4067>
